# Supplementary material for: The Effect of the Ketogenic Diet on Adiponectin, Omentin and Vaspin in Children with Drug-Resistant Epilepsy
Source: MDPI journal article supplement (doi:10.3390/nu14030479), 2022-01-22
Supplement: s1 [file s1]

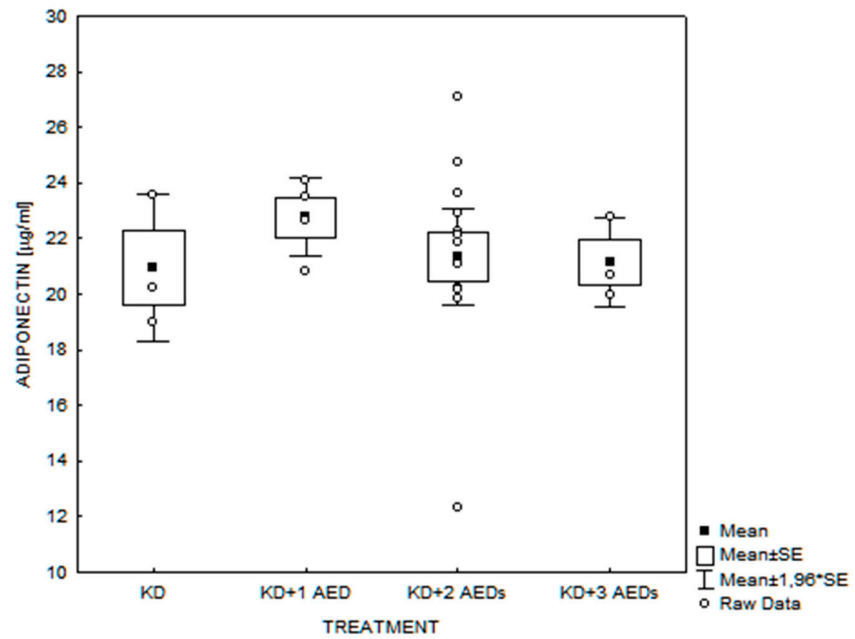

**Figure S1.** Results of serum adiponectin concentrations in the examined children treated with KD according to concomitant medication  
 $p=0.80$  (one-way ANOVA test); KD – ketogenic diet; AED – anti-epileptic drug; SE – standard error

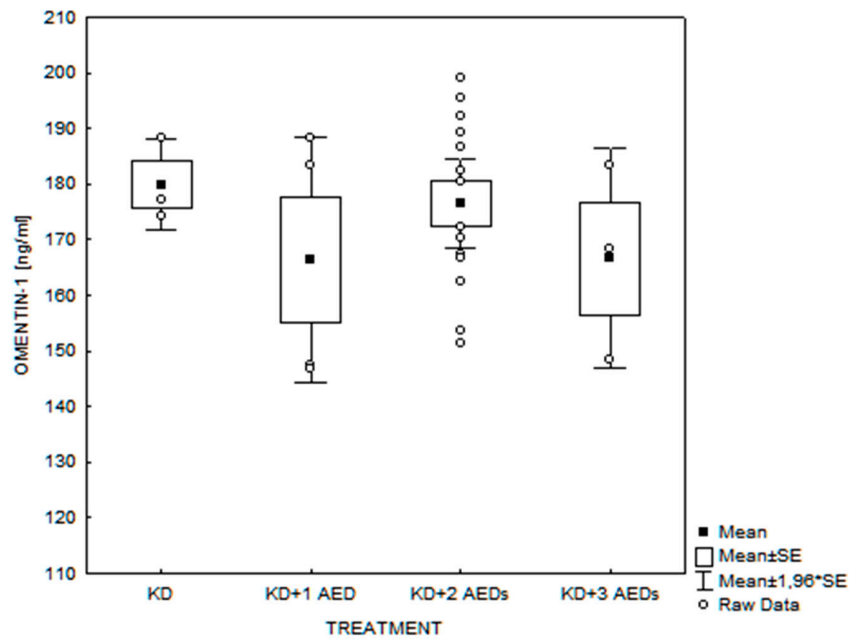

**Figure S2.** Results of serum omentin-1 concentrations in the examined children treated with KD according to concomitant medication  
 $p=0.54$  (one-way ANOVA test); KD – ketogenic diet; AED – anti-epileptic drug; SE – standard error

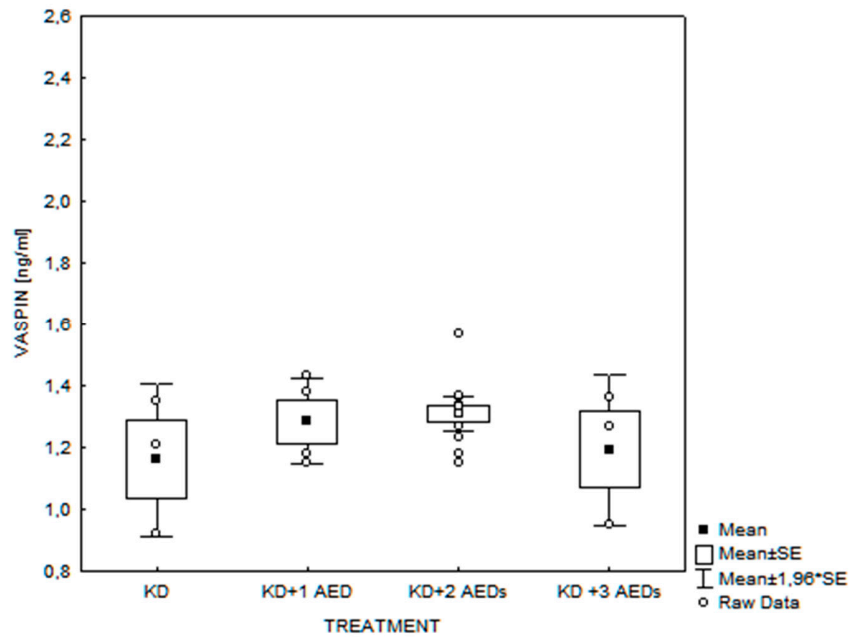

**Figure S3.** Results of serum vaspin concentrations in the examined children treated with KD according to concomitant medication  
 $p=0.31$  (one-way ANOVA test); KD – ketogenic diet; AED – anti-epileptic drug; SE – standard error

**Table S1.** Results of serum adiponectin, omentin-1 and vaspin concentrations in the examined children aged 3-5 and 6-9 years

| Parameter           | Group             |                                   |                                  |            |                                  |                                  |          |                                   |                                   |      |
|---------------------|-------------------|-----------------------------------|----------------------------------|------------|----------------------------------|----------------------------------|----------|-----------------------------------|-----------------------------------|------|
|                     | KD (n=24)         |                                   |                                  | VPA (n=26) |                                  |                                  | C (n=22) |                                   |                                   |      |
|                     | age [years]       | 3-5 (n=4)                         | 6-9 (n=20)                       | p          | 3-5 (n=7)                        | 6-9 (n=19)                       | p        | 3-5 (n=4)                         | 6-9 (n=18)                        | p    |
|                     | mean ± SD (range) |                                   |                                  |            | mean ± SD (range)                |                                  |          |                                   | mean ± SD (range)                 |      |
| adiponectin [μg/ml] |                   | 21.62 ± 1.73<br>(20.15-23.53)     | 21.47 ± 2.93<br>(12.35-27.11)    | 0.92       | 19.31 ± 1.58<br>(16.61- 21.40)   | 19.50 ± 1.22<br>(16.82- 21.56)   | 0.39     | 19.55 ± 1.39<br>(17.88-20.91)     | 19.87 ± 1.22<br>(17,71-22.18)     | 0.65 |
| omentin-1 [ng/ml]   |                   | 168.38 ± 25.78<br>(146.85-199.11) | 175.06 ±13.93<br>(148.38-195.42) | 0.46       | 141.11 ± 8.66<br>(130.67-151.69) | 139.87 ± 7.10<br>(128.13-150.41) | 0.49     | 142.56 ± 16.42<br>(125.43-161.10) | 136,66 ± 10,65<br>(121.48-162.91) | 0.37 |
| vaspin [ng/ml]      |                   | 1.25 ± 0.10<br>(1.15-1.33)        | 1.28 ± 0.15<br>(0.92-1,57)       | 0.72       | 2.13 ± 0.16<br>(1.89-2.31)       | 2.13 ± 0.10<br>(1.89-2.32)       | 0.15     | 2.24 ± 0.14<br>(2.08-2.37)        | 2.07 ± 0.21<br>(1.52-2.51)        | 0.19 |

KD – patients with epilepsy treated with the ketogenic diet and pharmacotherapy; VPA – group of patients with epilepsy treated with valproates; C – control group; SD – standard deviation
